# Supplementary material for: Synthesis and reactivity of the yttrium-alkyl-carbene complex [Y(BIPM)(CH2C6H5)(THF)] (BIPM = {C(PPh2NSiMe3)2})
Source: Royal Society of Chemistry journal article supplement (doi:10.1039/b902079a), 2009-01-01
Supplement: b902079a.pdf [file b902079a.pdf]

- *Supplementary Information* -

## Synthesis and Reactivity of the Yttrium-Alkyl-Carbene Complex

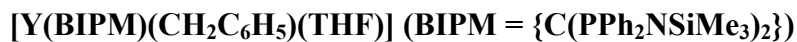

David P. Mills, Oliver J. Cooper, Jonathan McMaster, William Lewis and Stephen. T.

Liddle\*

School of Chemistry, University of Nottingham, University Park, Nottingham, NG7

2RD UK

\*E-mail: [stephen.liddle@nottingham.ac.uk](mailto:stephen.liddle@nottingham.ac.uk)

### Coordinates and Energy for 3

|       |           |           |           |
|-------|-----------|-----------|-----------|
| 1.H   | -0.723398 | 3.189830  | -5.196961 |
| 2.H   | 0.104368  | 1.633085  | -4.946057 |
| 3.H   | 2.216987  | -1.670344 | -4.842984 |
| 4.H   | 4.669359  | -1.500727 | -4.430888 |
| 5.C   | -0.171175 | 2.581712  | -4.461246 |
| 6.H   | -3.363070 | 2.191150  | -4.243971 |
| 7.H   | 0.758815  | 3.120181  | -4.225381 |
| 8.H   | -2.828988 | -2.149097 | -3.982091 |
| 9.C   | 2.593530  | -1.043598 | -4.031999 |
| 10.H  | -2.694197 | 0.561637  | -4.006488 |
| 11.C  | 3.969469  | -0.945948 | -3.803479 |
| 12.H  | -2.484359 | -3.865326 | -3.637495 |
| 13.C  | -2.873521 | 1.528848  | -3.511254 |
| 14.H  | 0.624876  | -0.391643 | -3.403068 |
| 15.H  | -4.997743 | -2.941823 | -3.116086 |
| 16.C  | -2.786329 | -2.909933 | -3.188878 |
| 17.C  | 1.699423  | -0.336377 | -3.223452 |
| 18.H  | -2.206003 | 4.638185  | -3.023323 |
| 19.Si | -1.251345 | 2.328304  | -2.919310 |
| 20.C  | 4.445334  | -0.139307 | -2.763658 |
| 21.H  | -3.587870 | 1.367122  | -2.688588 |
| 22.H  | 5.518372  | -0.063882 | -2.579594 |
| 23.C  | -4.130526 | -2.987029 | -2.444436 |
| 24.H  | 2.668903  | 3.061684  | -2.765578 |

|      |           |           |           |
|------|-----------|-----------|-----------|
| 25.H | 3.321866  | 5.442520  | -2.547661 |
| 26.H | -0.962629 | -1.904777 | -2.429051 |
| 27.C | -1.696636 | 4.045172  | -2.245994 |
| 28.H | -4.193535 | -3.918056 | -1.862275 |
| 29.C | 2.165516  | 0.467319  | -2.171852 |
| 30.H | -0.799465 | 4.601309  | -1.931805 |
| 31.C | -1.838412 | -2.466893 | -2.081894 |
| 32.C | 3.550615  | 0.556705  | -1.947998 |
| 33.H | -4.446025 | -0.863567 | -2.001592 |
| 34.C | 2.348385  | 3.630741  | -1.891543 |
| 35.C | 2.716923  | 4.974869  | -1.769099 |
| 36.N | -0.543995 | 1.272151  | -1.710329 |
| 37.H | -1.505603 | -3.313462 | -1.461861 |
| 38.C | -4.068587 | -1.775358 | -1.518884 |
| 39.H | -2.369274 | 3.982439  | -1.376348 |
| 40.H | 4.752185  | -4.484223 | -1.041564 |
| 41.H | -6.469339 | 1.650305  | -1.237109 |
| 42.H | 2.303175  | -4.935883 | -1.148062 |
| 43.O | -2.634168 | -1.568659 | -1.238595 |
| 44.H | 3.928911  | 1.174453  | -1.131408 |
| 45.P | 0.964653  | 1.273768  | -1.028840 |
| 46.C | 4.048982  | -3.807678 | -0.552530 |
| 47.C | 1.583815  | 3.008066  | -0.892151 |
| 48.C | 2.674837  | -4.058968 | -0.614270 |
| 49.H | -4.581794 | -1.912501 | -0.559572 |
| 50.H | 2.595601  | 6.765048  | -0.562481 |
| 51.C | 2.312563  | 5.714956  | -0.654327 |
| 52.H | -4.308206 | 2.569469  | -0.494496 |
| 53.C | -5.973294 | 1.211067  | -0.369135 |
| 54.H | -7.551752 | -0.231594 | 0.009679  |
| 55.H | 5.590629  | -2.477010 | 0.176448  |
| 56.C | 4.519213  | -2.679929 | 0.129968  |
| 57.C | -4.743951 | 1.724008  | 0.043355  |
| 58.C | 1.776295  | -3.188317 | 0.009096  |
| 59.H | 0.703167  | -3.380173 | -0.021955 |
| 60.C | -6.583589 | 0.157790  | 0.325401  |
| 61.Y | -1.508160 | 0.107411  | 0.150288  |
| 62.C | 1.196963  | 3.755810  | 0.232617  |
| 63.C | 1.549171  | 5.101775  | 0.347066  |
| 64.C | 0.814097  | 0.567543  | 0.490729  |
| 65.C | 3.620236  | -1.803455 | 0.741765  |
| 66.C | 2.237314  | -2.052483 | 0.691959  |
| 67.H | 0.621365  | 3.259740  | 1.015944  |
| 68.H | 1.232573  | 5.674086  | 1.220812  |
| 69.H | 3.993516  | -0.919783 | 1.263262  |
| 70.H | -2.572523 | -3.960048 | 1.115582  |
| 71.C | -4.062100 | 1.220116  | 1.190395  |
| 72.C | -5.928286 | -0.372448 | 1.445330  |
| 73.H | -2.528155 | 2.735653  | 1.270753  |
| 74.P | 1.026418  | -0.845121 | 1.381105  |

|       |           |           |          |
|-------|-----------|-----------|----------|
| 75.C  | -2.749135 | 1.708137  | 1.583565 |
| 76.N  | -0.462105 | -1.555200 | 1.509640 |
| 77.H  | -6.389085 | -1.184896 | 2.010973 |
| 78.H  | -3.479521 | -2.585598 | 1.799074 |
| 79.C  | -4.698423 | 0.135154  | 1.862879 |
| 80.C  | -2.738501 | -3.367313 | 2.028663 |
| 81.H  | 0.288309  | -4.699798 | 2.225772 |
| 82.H  | -2.493303 | 1.542907  | 2.636800 |
| 83.H  | -3.189678 | -4.034918 | 2.781034 |
| 84.H  | -4.226242 | -0.273492 | 2.759347 |
| 85.Si | -1.116062 | -2.648581 | 2.714649 |
| 86.C  | 0.014879  | -4.119478 | 3.119875 |
| 87.C  | 1.680654  | -0.470785 | 3.067002 |
| 88.H  | 0.674873  | 1.431329  | 3.092184 |
| 89.H  | 2.809082  | -2.298616 | 3.339750 |
| 90.H  | 0.946734  | -3.795797 | 3.607115 |
| 91.H  | -0.501654 | -4.797660 | 3.819319 |
| 92.C  | 1.279638  | 0.732055  | 3.672217 |
| 93.C  | 2.479547  | -1.364754 | 3.797242 |
| 94.H  | -2.242013 | -0.946171 | 4.196208 |
| 95.C  | -1.544087 | -1.784270 | 4.348511 |
| 96.H  | -0.645114 | -1.381264 | 4.840826 |
| 97.H  | -2.019440 | -2.495649 | 5.043597 |
| 98.C  | 1.653715  | 1.027511  | 4.984347 |
| 99.C  | 2.869461  | -1.061658 | 5.106475 |
| 100.H | 1.325817  | 1.960733  | 5.445847 |
| 101.H | 3.499726  | -1.760831 | 5.658405 |
| 102.C | 2.452354  | 0.130828  | 5.705292 |
| 103.H | 2.751970  | 0.363537  | 6.728679 |

Energy: -614.03733565 eV
